# Supplementary material for: Multifunctional ferritin nanocages for bimodal imaging and targeted delivery of doxorubicin into cancer cells
Source: Royal Society of Chemistry journal article supplement (doi:10.1039/c6ra13845d), 2016-01-01
Supplement: c6ra13845d1.pdf [file c6ra13845d1.pdf]

## Supporting information

A

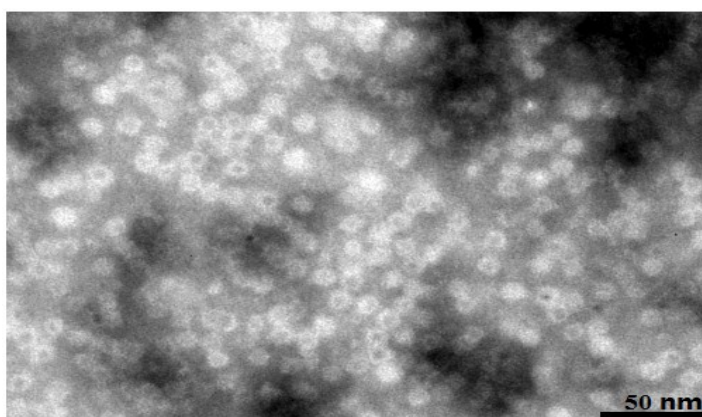

B

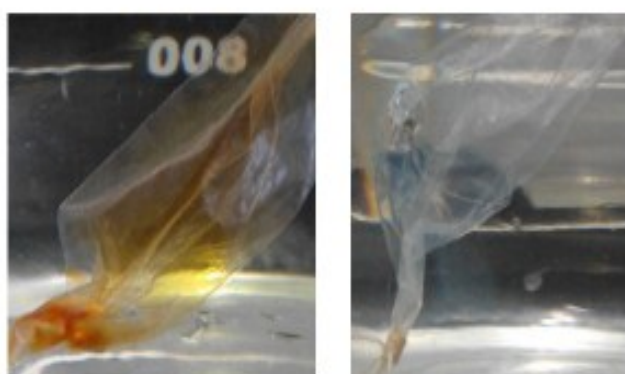

**S.Fig.2** A. TEM images of ferritin (samples were negatively stained for 2 min; scale bars: 50 nm);

B. Photographs in parts (a), and (b) show solutions of ferritin, and apoferritin.

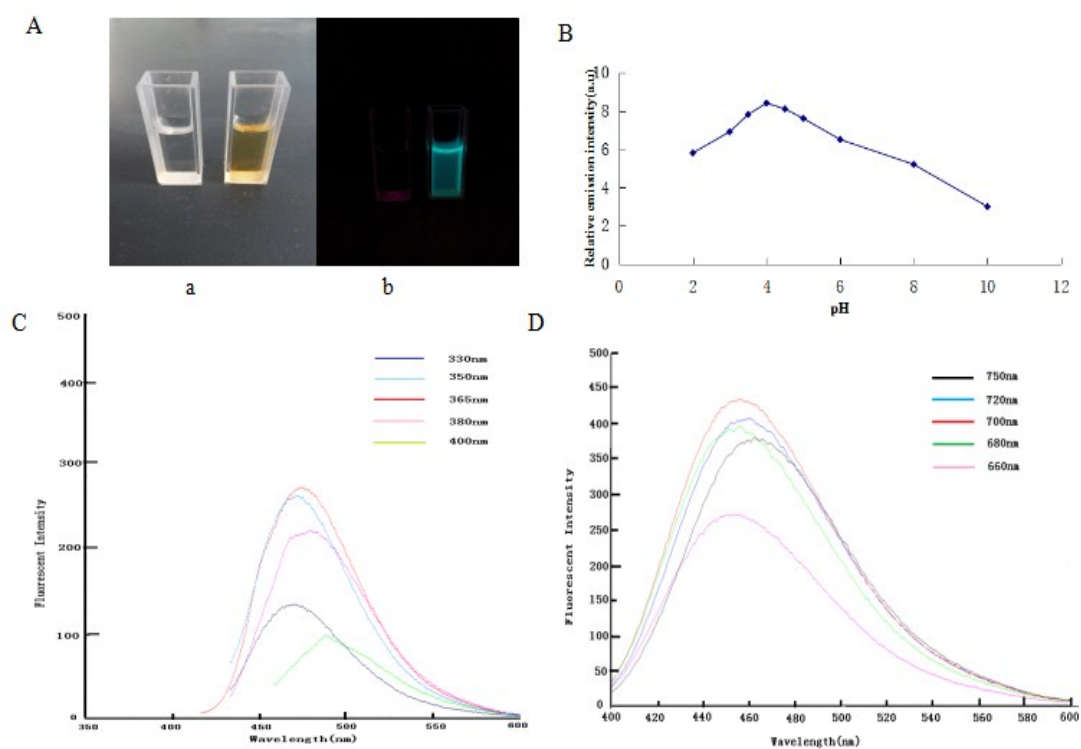

**S.Fig.3** A. Photographs of Cdots solutions under visible light (a) and UV beam of 365nm (b) in comparison with only water; B. Effect of pH on the fluorescence intensity of Cdots; C. down-conversion fluorescent properties of Cdots at different excitation wavelengths; D. Up-conversion fluorescent properties of Cdots at different excitation wavelengths.

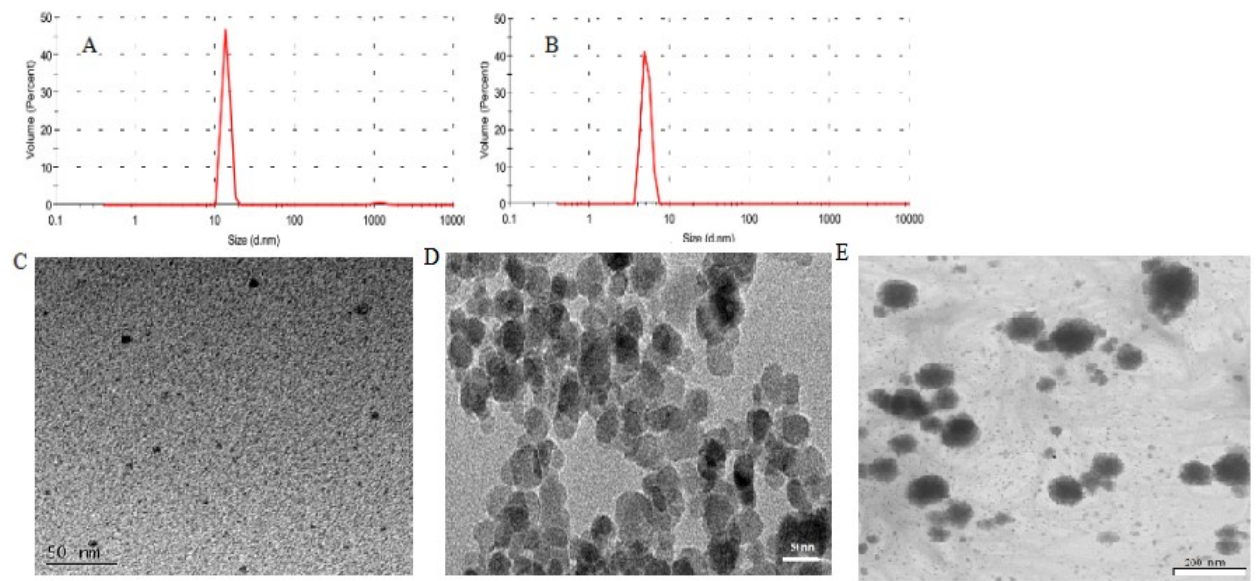

**S.Fig.5** The size and TEM image of nanoparticles. A) and B) DLS analysis results of ferritins and Cdots; The TEM image of Cdots(C)、Fe<sub>3</sub>O<sub>4</sub>(D)、Fe<sub>3</sub>O<sub>4</sub>-AFn/DOX-Cdots composite(E).

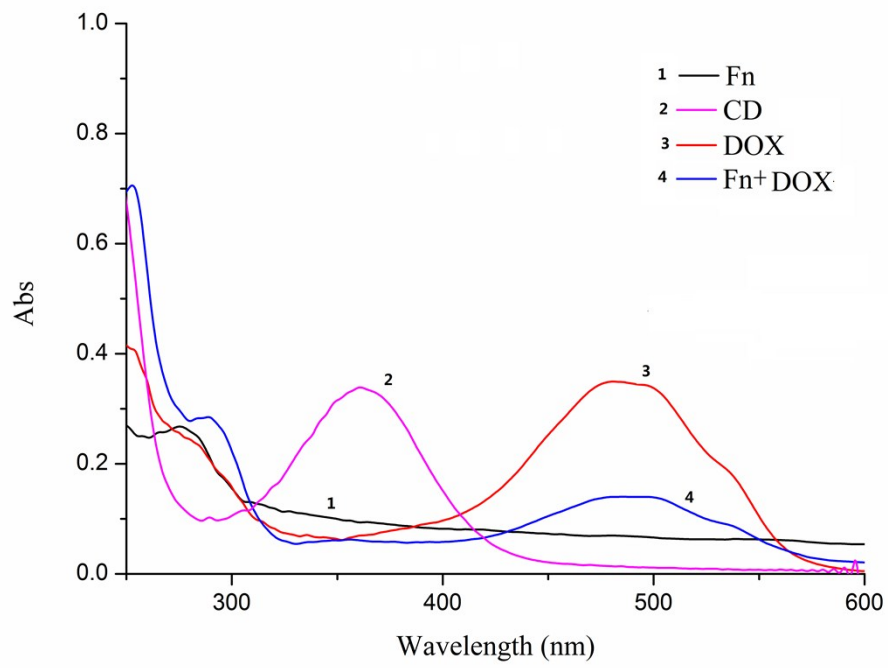

**S.Fig.6** UV-vis absorption spectra.

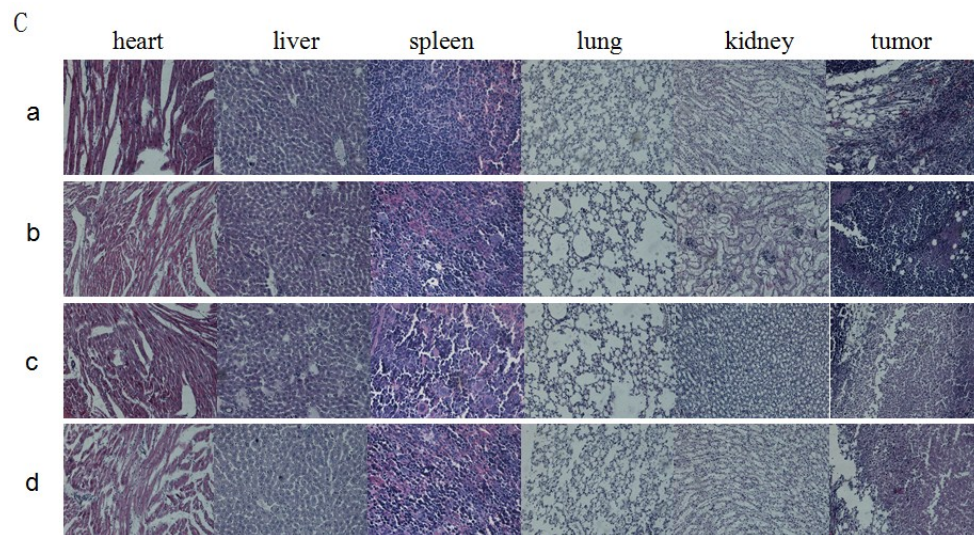

**S.Fig.10 C.** H&E stained tumor tissues harvested from the mice with different treatments. a-d:

Control, DOX, Fe<sub>3</sub>O<sub>4</sub>-AFn/DOX-Cdots, Fe<sub>3</sub>O<sub>4</sub>-AFn/DOX-Cdots/magnet. Data were presented as

mean ± standard deviation (n=5).

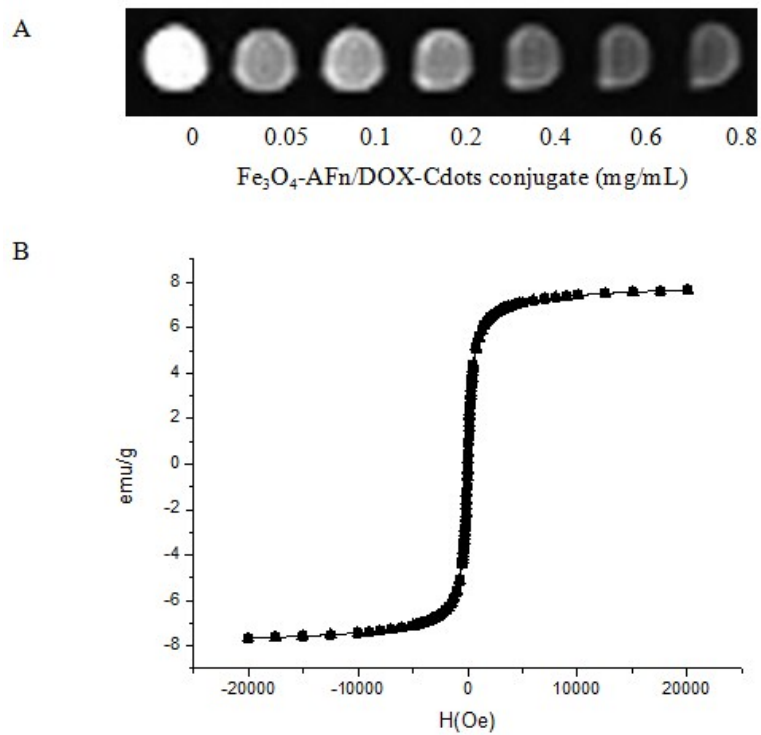

**S.Fig.11** Magnetic properties of the Fe<sub>3</sub>O<sub>4</sub>-AFn/DOX-Cdots conjugate. A. T<sub>2</sub>-weighted MR images of the Fe<sub>3</sub>O<sub>4</sub>-AFn/DOX-Cdots conjugate at different concentrations; B. Magnetization loops.
